# Supplementary material for: SOCS1 Deficiency Promotes Hepatocellular Carcinoma via SOCS3-Dependent CDKN1A Induction and NRF2 Activation
Source: MDPI journal article supplement (doi:10.3390/cancers15030905), 2023-01-31
Supplement: s1 [file s1]

# SOCS1 Deficiency Promotes Hepatocellular Carcinoma via SOCS3-Dependent CDKN1A Induction and NRF2 Activation

Md Gulam Musawwir Khan et al.,

This PDF file includes:

Supplementary Tables S1 to S5

Supplementary Figures. S1 to S4

**Table S1.** List of Mouse strains used in this study.

| Strain                                                               | Citation       | Supplier                     |
|----------------------------------------------------------------------|----------------|------------------------------|
| <i>Socs1<sup>fl/fl</sup></i>                                         | PMID: 18322180 | Dr. Akihiko Yoshimura, Tokyo |
| <i>Socs3<sup>fl/fl</sup></i>                                         | PMID: 12754507 | Jax mice, Stock # 010944     |
| <i>Alb<sup>Cre</sup></i>                                             | PMID: 9867845  | Jax mice, Stock # 003574     |
| <i>Cdkn1a<sup>-/-</sup></i>                                          | PMID: 7566157  | Jax mice, Stock # 003263     |
| <i>Tp53<sup>-/-</sup></i>                                            | PMID: 7922305  | Jax mice, Stock # 002101     |
| <i>Socs1<sup>fl/fl</sup> Alb<sup>Cre</sup></i>                       | PMID: 26725321 | Previously generated         |
| <i>Socs3<sup>fl/fl</sup> Alb<sup>Cre</sup></i>                       | PMID: 32807134 | Previously generated         |
| <i>Socs1<sup>fl/fl</sup> Soxs3<sup>fl/fl</sup></i>                   | PMID: 32807134 | Previously generated         |
| <i>Socs1<sup>fl/fl</sup> Soxs3<sup>fl/fl</sup> Alb<sup>Cre</sup></i> |                | Generated for this study     |
| <i>Cdkn1a<sup>-/-</sup> Soxs1<sup>fl/fl</sup> Alb<sup>Cre</sup></i>  |                | Generated for this study     |
| <i>Tp53<sup>-/-</sup> Soxs1<sup>fl/fl</sup> Alb<sup>Cre</sup></i>    |                | Generated for this study     |

**Table S2.** List of reagents used in this study.

| Name                     | Supplier      | Cat # |
|--------------------------|---------------|-------|
| Diethylnitrosamine (DEN) | Sigma-Aldrich | N0258 |
| RNeasy Mini Kit          | Qiagen        | 74104 |
| RNAlater®                | Qiagen        | 76106 |
| QIAzol® Lysis Reagent    | Qiagen        | 79306 |

**Table S3.** List of software used.

| Software name               | Manufacturer              | Version |
|-----------------------------|---------------------------|---------|
| Adobe Photoshop/Illustrator | Adobe Inc.                | CC      |
| CFX manager                 | Bio-Rad Laboratories, Inc | 3.1     |
| Image Lab™                  | Bio-Rad Laboratories, Inc | 6       |
| NDP.view2                   | Hamamatsu Photonics K.K   |         |
| Prism                       | GraphPad                  | 9       |

**Table S4.** List of antibodies used in this study.

| Name                                 | Citation       | Supplier                  | Cat no.  | Clone no.  |
|--------------------------------------|----------------|---------------------------|----------|------------|
| <b>Immunofluorescence</b>            |                |                           |          |            |
| Rabbit anti- Ki67                    | PMID: 20152769 | Cell Signaling Technology | #9129    | D3B5       |
| Mouse anti-4-hydroxy-nonenol (4-HNE) | PMID: 30878614 | abcam                     | Ab48506  | HNEJ-2     |
| <b>Western blot</b>                  |                |                           |          |            |
| Rabbit-anti p21                      | PMID: 20959475 | Santa Cruz Biotechnology  | SC-471   | Polyclonal |
| Mouse-anti p21                       | PMID: 32499530 | Santa Cruz Biotechnology  | SC-817   | mAb        |
| Rabbit anti-NRF2                     | PMID: 19417020 | Cell Signaling Technology | #12721   | D1Z9C      |
| Rabbit anti-Nrf2                     | PMID: 30896860 | abcam                     | ab156883 | Polyclonal |
| Rabbit anti $\beta$ -Actin           | PMID: 19933848 | Cell Signaling Technology | #4970    | 13E5       |
| Mouse anti-p53                       | PMID: 26725321 | Cell Signaling Technology | #2524    | 1C12       |
| Rabbit anti-Phospho p53 (Ser15)      | PMID: 26725321 | Cell Signaling Technology | #9284    | Polyclonal |
| Rabbit anti-Stat3                    | PMID: 26725321 | Santa Cruz Biotechnology  | SC-483   | Polyclonal |
| Rabbit anti-Phospho Stat3 (Y705)     | PMID: 26725321 | Cell Signaling Technology | #9131    | Polyclonal |

**Table S5.** List of RT-qPCR primers used in this study.

| <b>Gene Name</b>                | <b>Gene ID</b> | <b>Forward Sequence (5'-3')</b> | <b>Reverse Sequence (5'-3')</b> | <b>Amplicon size (bp)</b> |
|---------------------------------|----------------|---------------------------------|---------------------------------|---------------------------|
| <i>36B4</i><br>( <i>Rplp0</i> ) | NM_007475.5    | TCTGGAGGGTGTCCGCAA              | CTTGACCTTTTCAGTAAGTGG           | 154                       |
| <i>Cdkn1a</i>                   | NM_007669.5    | TTCTATCACTCCAAGCGCAG            | CAGGCAGCGTATATACAGGAG           | 185                       |
| <i>Gadd45a</i>                  | NM_007836.1    | AGTCAGCGCACCATTACG              | TGAGGGTGAAATGGATCTGC            | 139                       |
| <i>Gclc</i>                     | NM_010295.2    | ACCATCACTTCATTCCCCAG            | TTCTTGTTAGAGTACCGAAGCG          | 148                       |
| <i>Gpx1</i>                     | NM_008160.6    | GACTACACCGAGATGAACGATC          | TCTCACCATTCACTTCGCAC            | 199                       |
| <i>Gpx2</i>                     | NM_030677.2    | GTAGTTCTCGGCTTCCCTTG            | GGTAAGACTAAAGGTGGGCTG           | 123                       |
| <i>Gstm1</i>                    | NM_001374678.1 | CTATGATACTGGGATACTGGAACG        | ACTTCTCATTCACTCAGCCACTGG        | 147                       |
| <i>Gstm4</i>                    | NM_026764.3    | TGAAGGTGGAATACTTGGAGC           | GGGTTTCGAATATAAGGTGCAGG         | 149                       |
| <i>Hmox1</i>                    | NM_010442.2    | ACAGAGGAACACAAAGACCAG           | GTGTCTGGGATGAGCTAGTG            | 136                       |
| <i>Keap1</i>                    | NM_001110306.1 | CTCCGCAGAATGTTACTATCCAG         | ACACTGTTCAACTGGTCCTG            | 147                       |
| <i>Mdm2</i>                     | NM_010786.4    | TGGCGTAAGTGAGCATTCTG            | CTGTATCGCTTTCTCCTGTCTG          | 188                       |
| <i>Nfe2l2</i>                   | NM_010902.4    | TCCCATTGTAGATGACCATGAG          | CCATGTCCTGCTCTATGCTG            | 150                       |
| <i>Nqo1</i>                     | NM_008706.5    | TGAAGAAGAGAGGATGGGAGG           | GATGACTCGGAAGGATACTGAAAG        | 130                       |
| <i>Sesn1</i>                    | NM_001162908.1 | GGACGAGGAACCTTGAATCAG           | CAAAGGAGTCTGCAAATAACGC          | 131                       |
| <i>Sesn2</i>                    | NM_144907.1    | CAGCCTCACCTATAACACCATC          | CTCGCCGTAATCATAGTCATCG          | 124                       |
| <i>Socs1</i>                    | NM_001271603.1 | TGGTTGTAGCAGCTTGTGTCTGG         | CCTGGTTTGTGCAAAGATACTGGG        | 92                        |
| <i>Socs3</i>                    | NM_007707.3    | GAGATTTTCGCTTCGGGACTAG          | TTTGGAGCTGAAGGTCTTGAG           | 193                       |
| <i>Tp53</i>                     | NM_011640.3    | AGTTCATTGGGACCATCCTG            | GCTGATATCCGACTGTGACTC           | 149                       |

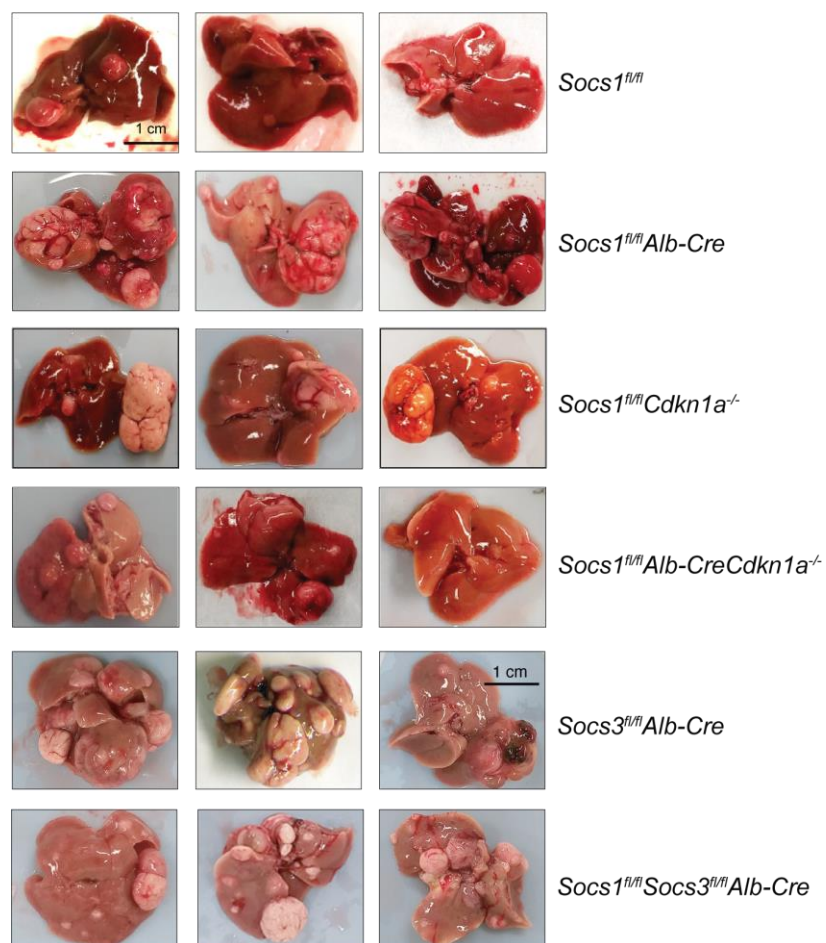

**Figure S1.** Increased susceptibility of SOCS1-deficient mice to HCC requires CDKN1A and SOCS3. Two weeks-old mice of the indicated genotype were treated with DEN (25 mg/Kg bodyweight, i.p.). HCC development was evaluated ten months later. Livers from three representative mice for each genotype are shown.

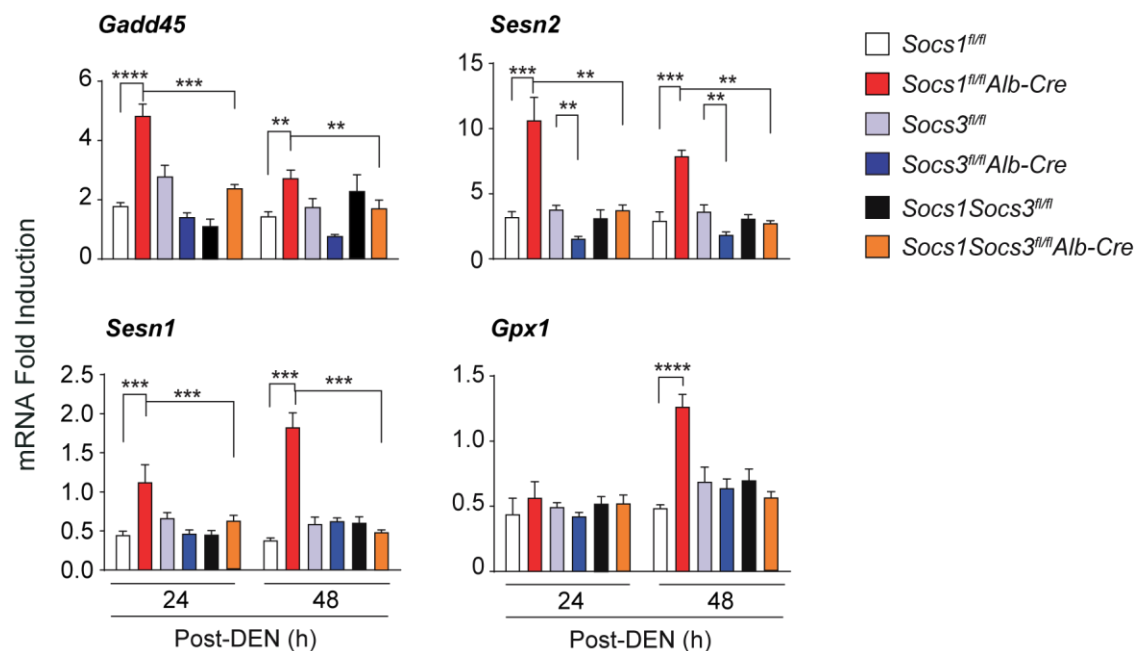

**Figure S2.** Increased induction of p53 target genes in SOCS1-deficient livers following genotoxic stress requires SOCS3. Mice lacking SOCS1, SOCS3 or both in hepatocytes, and the corresponding control mice were treated with DEN (100 mg/Kg BW, i.p.). Induction of the indicated p53 target genes in the liver tissue was evaluated by RT-qPCR at 24 and 48 h later. n= 3-6 mice per group. mRNA fold induction was calculated relative to the expression in untreated mice of the same genotype after normalization to the housekeeping gene *Rplp0*. (Mean  $\pm$  SD. Two-way ANOVA with Tukey's test, p: \*\* <0.01, \*\*\* <0.001, \*\*\*\* <0.0001.

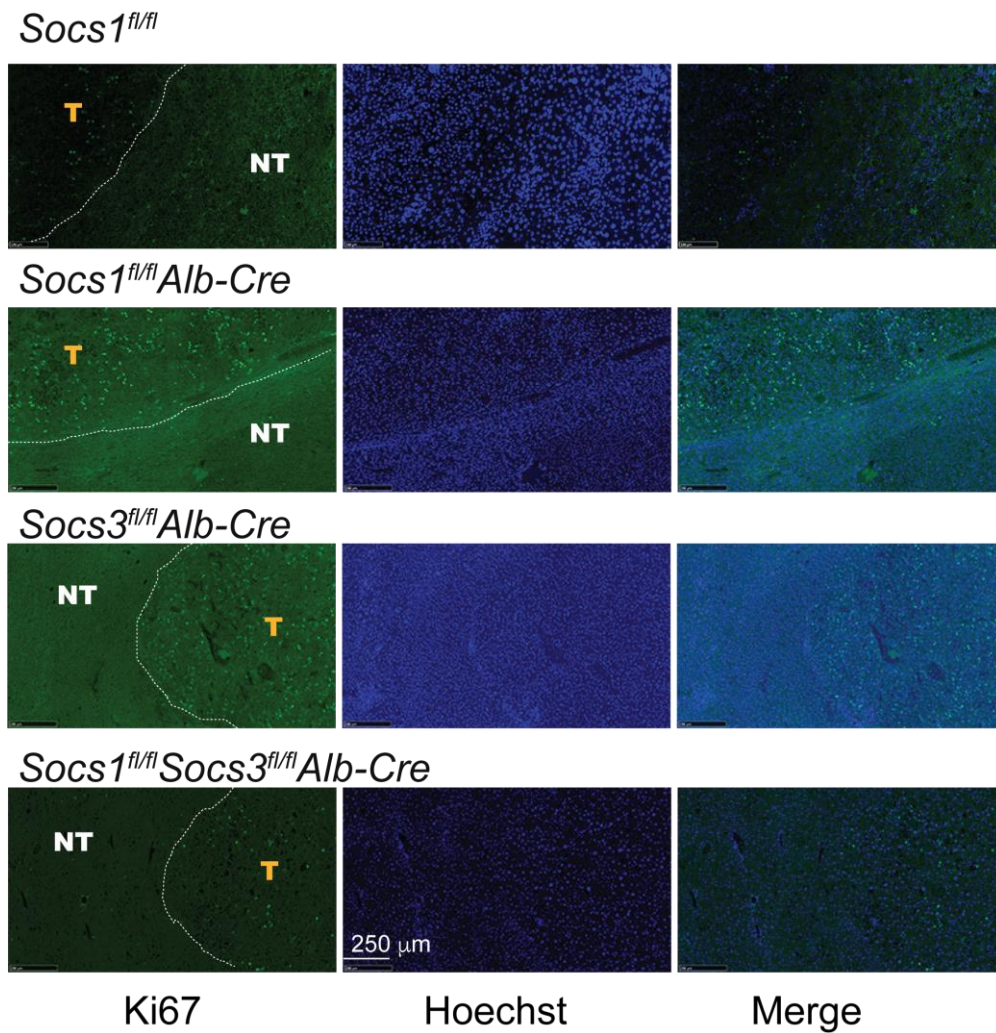

**Figure S3.** Ki67 immunostaining in DEN-induced HCC. Liver sections from tumor bearing mice of the indicated genotypes ( $\geq 3$  mice/group) were stained with anti-Ki67 antibody. Representative images for each genotype are shown. Tumor nodules (T) are demarcated from the surrounding normal tissue (NT).

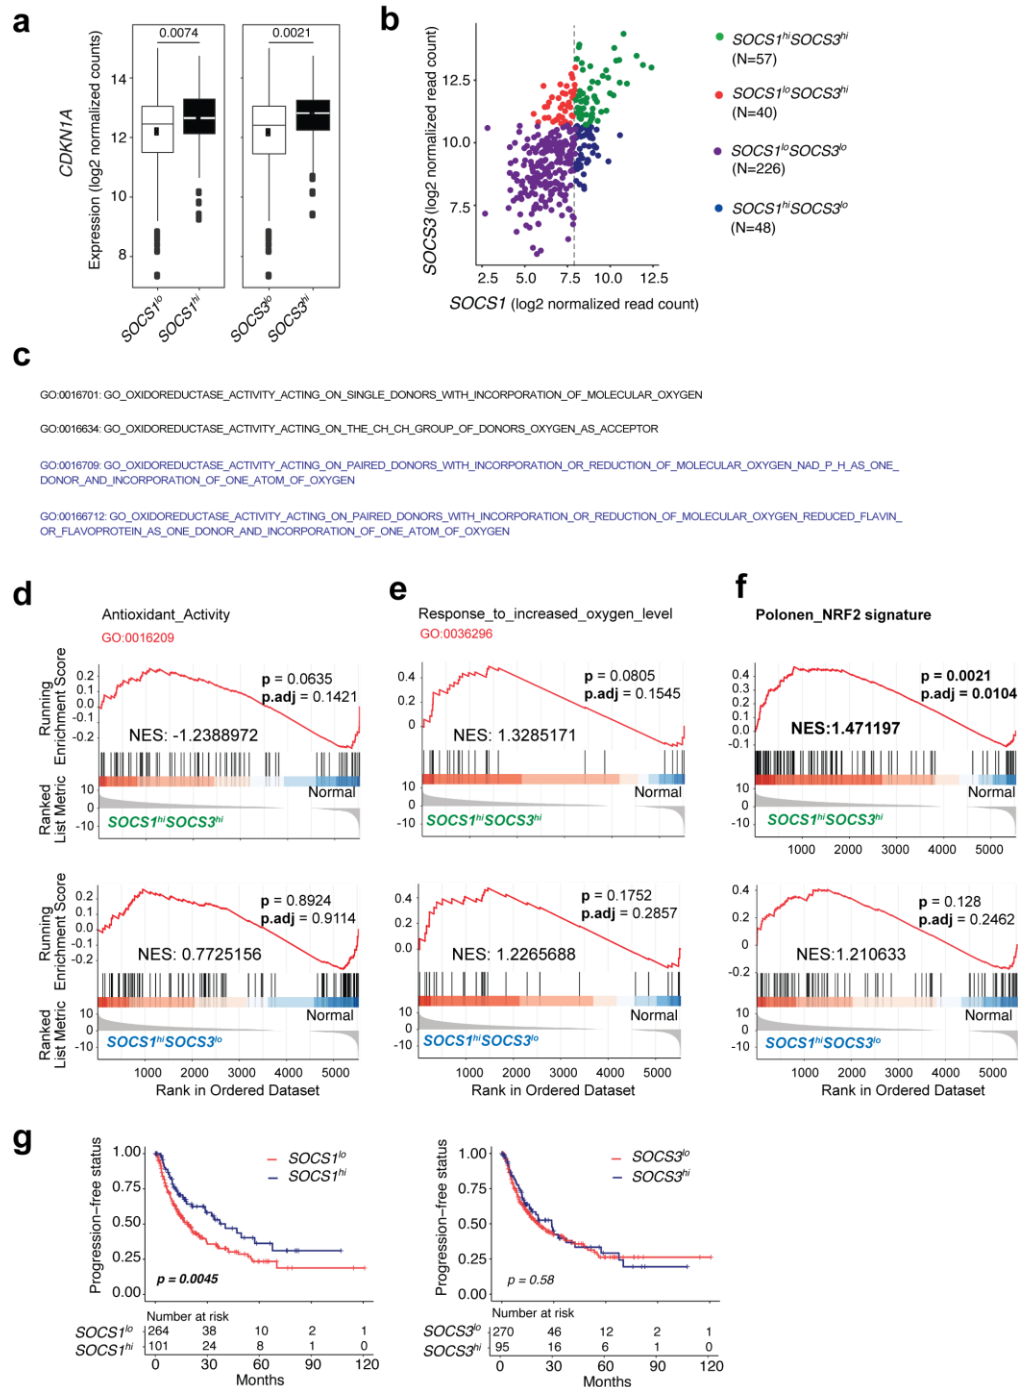

**Figure S4.** Supplementary data on TCGA-LIHA transcriptomic data analyses. (a) *CDKN1A* expression in TCGA-LIHC cases dichotomized based on *SOCS1* or *SOCS3* mRNA levels (z score). (b) Segregation of the TCGA-LIHC dataset into *SOCS1*-high/*SOCS3*-high, *SOCS1*-low/*SOCS3*-high, *SOCS1*-low/*SOCS3*-low and *SOCS1*-high/*SOCS3*-low groups based on z-score. (c) GO terms that are too large to expand in Figure 4b. (d–f) GSEA plots showing the enrichment levels of the GO terms ‘Antioxidant\_Activity’ pathway (d) ‘Response\_to\_increased\_oxygen\_level’ pathway (e) and ‘Polonen\_NRF2 Signature’ genes (f) in the HCC patient groups not shown in Figure 4. (g) Low *SOCS1* expression level but not *SOCS3* expression predicts poor prognosis.
